# Supplementary material
Source: Springer Nature journal article supplement (https://www.springermedizin.de/resource/supplementary/12974_2010_303_MOESM4_ESM.pdf/9601208)

**A****MVN****IVN****SHAM**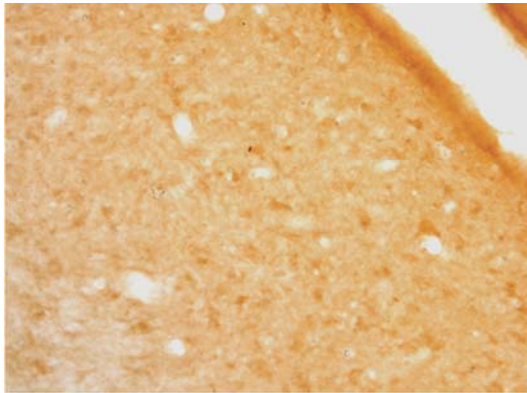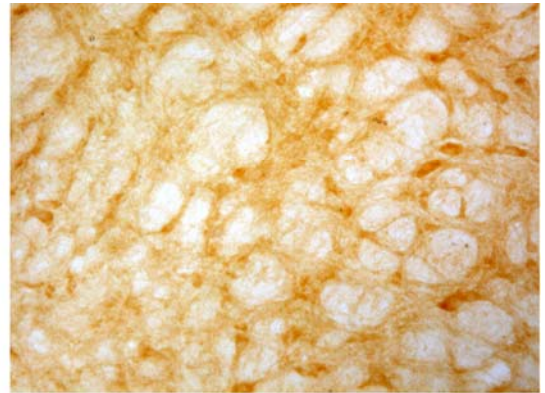**LESIONED**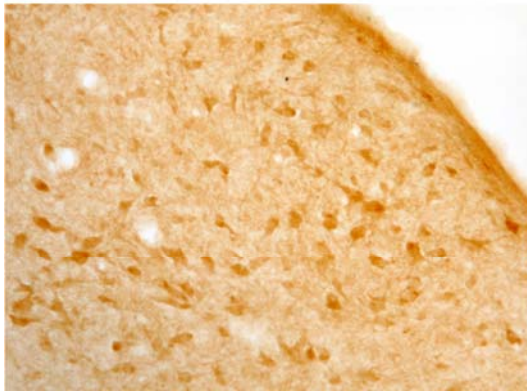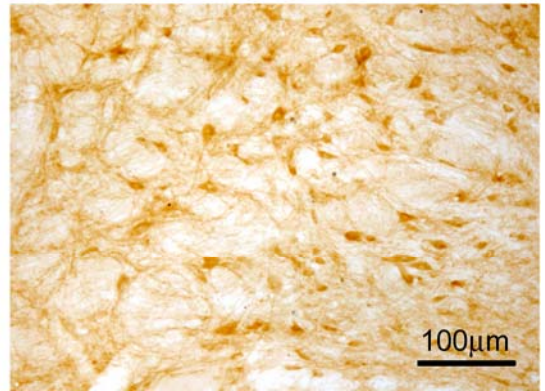**B****MVN****IVN**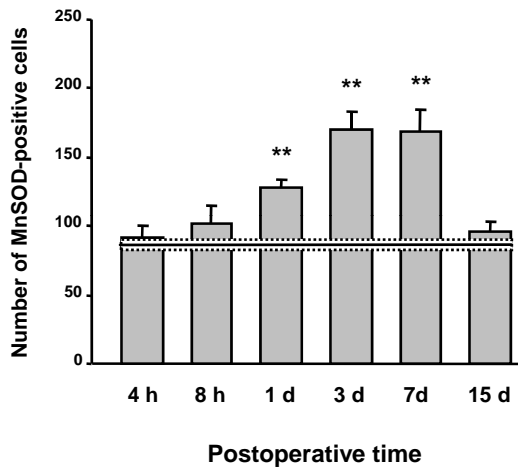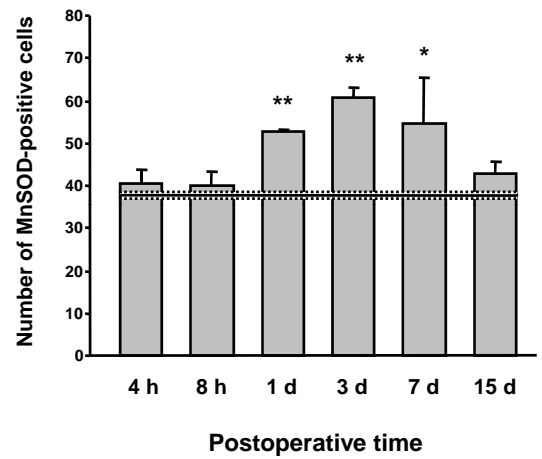

Supplement: MOESM4 [file 9601208]
